# Supplementary material for: Nitric Oxide-Releasing Drug Glyceryl Trinitrate Targets JAK2/STAT3 Signaling, Migration and Invasion of Triple-Negative Breast Cancer Cells
Source: MDPI journal article supplement (doi:10.3390/ijms22168449), 2021-08-06
Supplement: s1 [file s1]

## Supplementary Figure S1

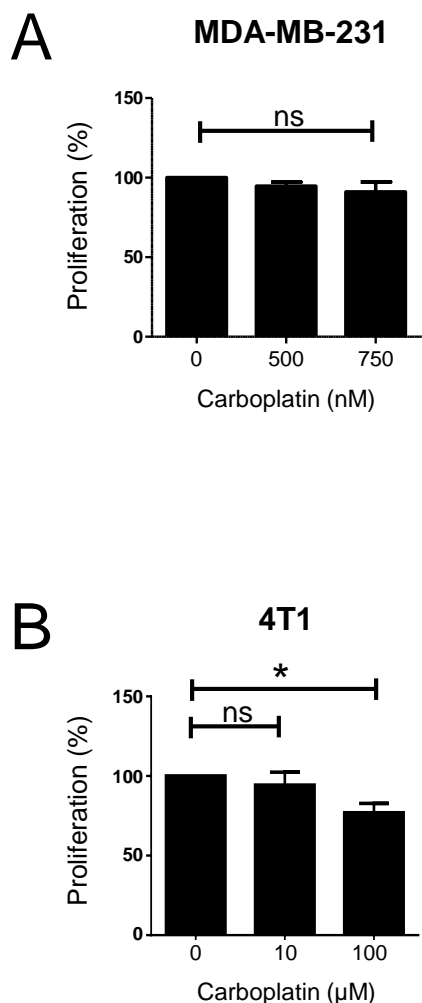

**Figure S1.** Effect of carboplatin on MDA-MB-231 and 4T1 cell proliferation. **(A)** MDA-MB-231 and **(B)** 4T1 cells were treated with the indicated concentration of carboplatin for 48 h and MTS proliferation assay analysis was performed. Results indicate means  $\pm$  SD of three independent experiments. Statistically significant differences were determined using a one-way ANOVA test. \*  $p < 0.05$ ; ns: not significant.

## Supplementary Figure S2

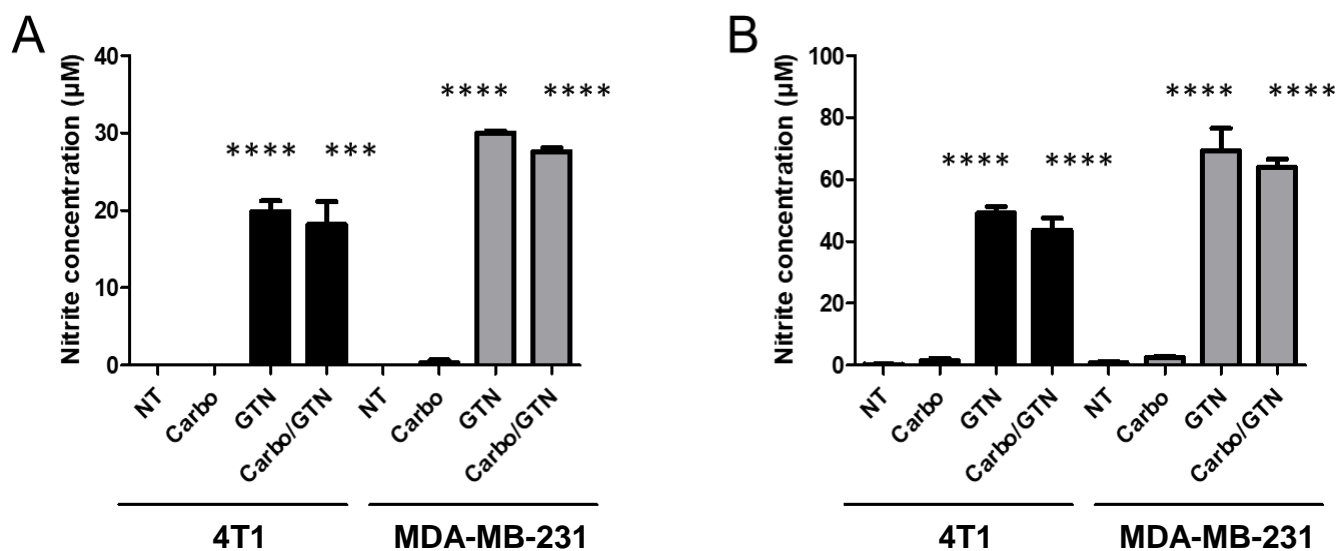

**Figure S2.** Determination of  $\text{NO}_2^-$  concentration. The 4T1 and MDA-MB-231 cells were or were not treated with carboplatin (10  $\mu\text{M}$  and 750 nM, respectively), GTN (250  $\mu\text{M}$ ), Carboplatin/GTN for (A) 24 h and (B) 48 h, and the Griess reaction assay was performed to measure the concentration of the NO stable end product  $\text{NO}_2^-$ . Error bars represent SEM of three independent experiments. Significant difference from control was determined using a one-way ANOVA test followed by a Bonferroni's multiple comparison post-test. \*\*\*  $p < 0.01$ ; \*\*\*\*  $p < 0.001$ .

## Supplementary Figure S3

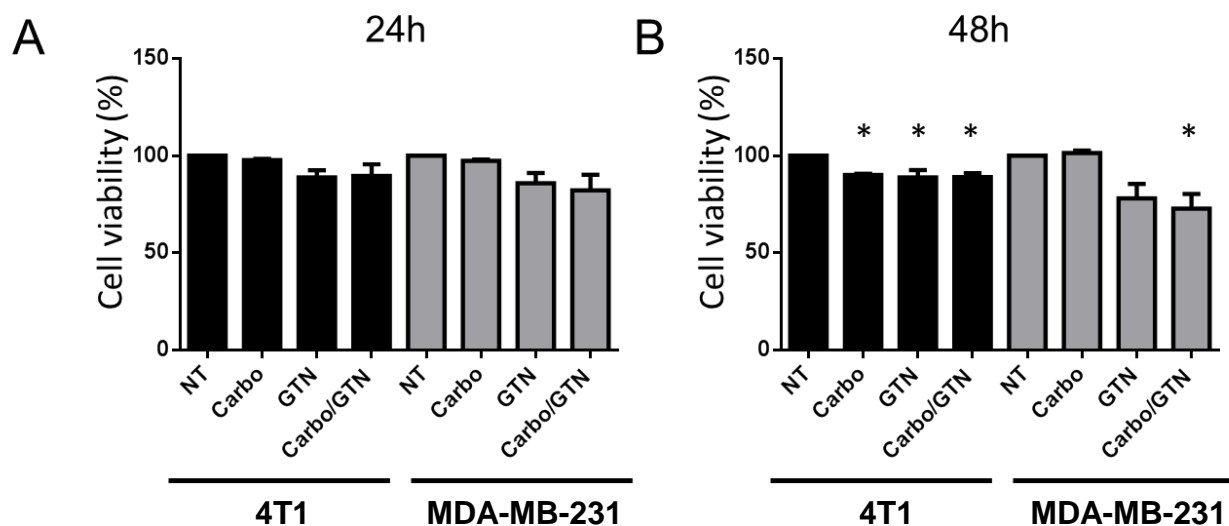

**Figure S3.** In vitro cytotoxicity on TNBC cell lines after treatment with GTN (250  $\mu$ M) alone or in combination with carboplatin. MTS assays evaluating cytotoxicity on 4T1 and MDA-MB-231 cells treated with carboplatin, GTN or carboplatin/GTN after (A) 24 h and (B) 48 h. Experiments were performed in triplicate and repeated three times. Error bars represent SEM. Significant difference from control was determined using a one-way ANOVA test followed by a Bonferroni's multiple comparison post-test. \*  $p < 0.05$ .

## Supplementary Figure S4

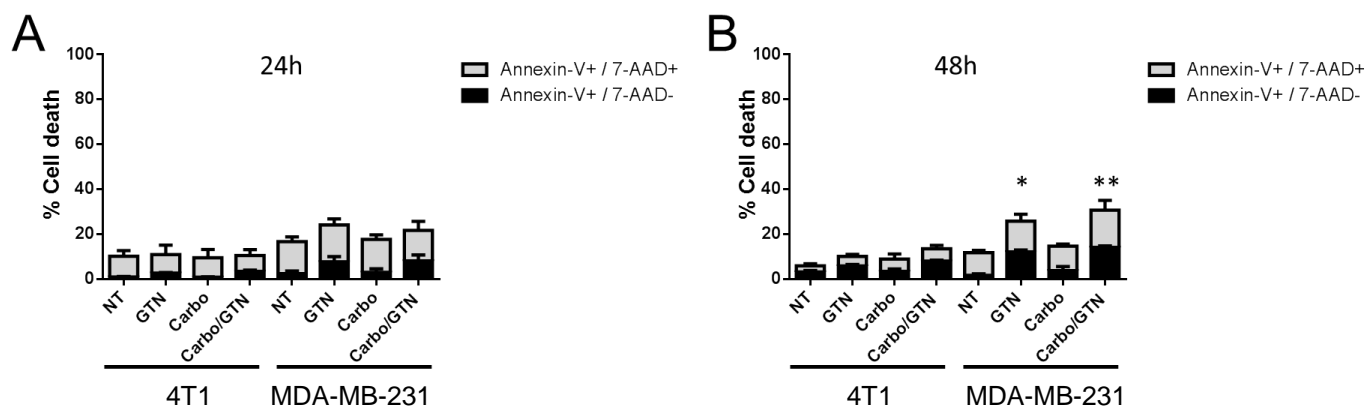

**Figure S4.** Effect of GTN on apoptosis in 4T1 and MDA-MB-231 cells. The 4T1 and MDA-MB-231 cells were treated with GTN (250  $\mu$ M), carboplatin (10  $\mu$ M and 750 nM, respectively) and carboplatin/GTN for (A) 24 h and (B) 48 h. Annexin-V/7-AAD double staining was used to assess the quantification of early apoptotic cells (Annexin-V+/7-AAD-) and late apoptotic/necrotic cells (Annexin-V+/7-AAD+). Significant difference from control was determined using a one-way ANOVA test followed by a Bonferroni's multiple comparison post-test. \*  $p < 0.05$ ; \*\*  $p < 0.01$ .
